# Supplementary material for: Anticancer Drugs for Intra-Arterial Treatment of Colorectal Cancer Liver Metastases: In-Vitro Screening after Short Exposure Time
Source: MDPI journal article supplement (doi:10.3390/ph14070639), 2021-07-01
Supplement: s1 [file s1]

Supplementary Material:

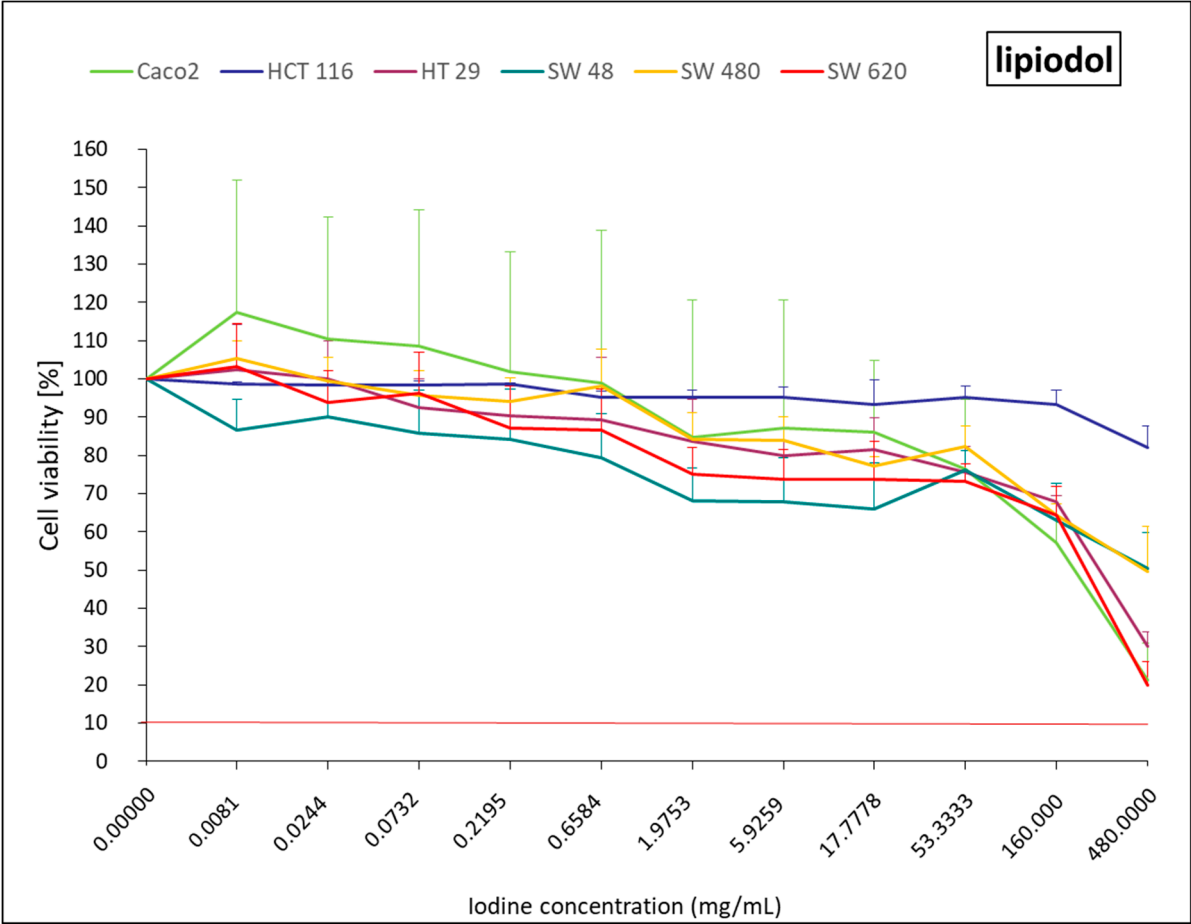

**Figure S1.** Colorectal cancer cell line viability curves after a 30-min time-contact with lipiodol. The horizontal red line represents 10% of cell viability. The results are presented after normalization with the control cells (untreated condition).

**Table S1.** Statistical analysis (LSD-Fisher) for cell viability curves. Values represents the LSD-Fisher p-value for any concentration versus control, for each drug and each cell line. P-value <0.05 are in red.

|                | doxorubicin |          |          |          |          |          |
|----------------|-------------|----------|----------|----------|----------|----------|
|                | CaCO2       | HCT 116  | HT29     | SW48     | SW480    | SW620    |
| C Max / 59 049 | 0.783576    | 0.180173 | 0.276931 | 0.096282 | 0.000682 | 0.033041 |
| C Max / 19 683 | 0.562118    | 0.044211 | 0.009418 | 0.008290 | 0.000001 | 0.000083 |
| C Max / 6561   | 0.923713    | 0.165543 | 0.000331 | 0.000473 | 0.000000 | 0.000005 |
| C Max / 2187   | 0.899942    | 0.000419 | 0.000002 | 0.000063 | 0.000000 | 0.000000 |
| C Max / 729    | 0.895942    | 0.000000 | 0.000000 | 0.000023 | 0.000000 | 0.000000 |
| C Max / 243    | 0.676869    | 0.000000 | 0.000000 | 0.000000 | 0.000000 | 0.000000 |
| C Max / 81     | 0.121786    | 0.000000 | 0.000000 | 0.000000 | 0.000000 | 0.000000 |
| C Max / 27     | 0.019697    | 0.000000 | 0.000000 | 0.000001 | 0.000000 | 0.000000 |
| C Max / 9      | 0.001408    | 0.000000 | 0.000000 | 0.000000 | 0.000000 | 0.000000 |
| C Max / 3      | 0.000279    | 0.000000 | 0.000000 | 0.000000 | 0.000000 | 0.000000 |
| C Max          | 0.000001    | 0.000000 | 0.000000 | 0.000000 | 0.000000 | 0.000000 |
|                | epirubicin  |          |          |          |          |          |
|                | CaCO2       | HCT 116  | HT29     | SW48     | SW480    | SW620    |
| C Max / 59 049 | 0.878195    | 0.214789 | 0.607786 | 0.072010 | 0.006276 | 0.000004 |
| C Max / 19 683 | 0.946534    | 0.242493 | 0.061231 | 0.005525 | 0.000007 | 0.000000 |
| C Max / 6561   | 0.379920    | 0.266857 | 0.003066 | 0.000000 | 0.000000 | 0.000000 |
| C Max / 2187   | 0.171299    | 0.000166 | 0.000032 | 0.000000 | 0.000000 | 0.000000 |
| C Max / 729    | 0.013034    | 0.000000 | 0.000000 | 0.000000 | 0.000000 | 0.000000 |
| C Max / 243    | 0.000259    | 0.000000 | 0.000000 | 0.000000 | 0.000000 | 0.000000 |
| C Max / 81     | 0.000010    | 0.000000 | 0.000000 | 0.000000 | 0.000000 | 0.000000 |
| C Max / 27     | 0.000000    | 0.000000 | 0.000000 | 0.000000 | 0.000000 | 0.000000 |
| C Max / 9      | 0.000000    | 0.000000 | 0.000000 | 0.000000 | 0.000000 | 0.000000 |
| C Max / 3      | 0.000000    | 0.000000 | 0.000000 | 0.000000 | 0.000000 | 0.000000 |
| C Max          | 0.000000    | 0.000000 | 0.000000 | 0.000000 | 0.000000 | 0.000000 |
|                | idarubicin  |          |          |          |          |          |
|                | CaCO2       | HCT 116  | HT29     | SW48     | SW480    | SW620    |
| C Max / 59 049 | 0.720627    | 0.000000 | 0.529328 | 0.002716 | 0.732430 | 0.047629 |
| C Max / 19 683 | 0.285238    | 0.000000 | 0.056943 | 0.001411 | 0.984214 | 0.000000 |
| C Max / 6561   | 0.002090    | 0.000000 | 0.000734 | 0.000502 | 0.680906 | 0.000000 |
| C Max / 2187   | 0.000000    | 0.000000 | 0.000083 | 0.000012 | 0.034879 | 0.000000 |
| C Max / 729    | 0.000000    | 0.000000 | 0.000073 | 0.000020 | 0.012891 | 0.000000 |
| C Max / 243    | 0.000000    | 0.000000 | 0.007693 | 0.000042 | 0.189255 | 0.000000 |
| C Max / 81     | 0.000000    | 0.000000 | 0.001307 | 0.000212 | 0.080015 | 0.000000 |
| C Max / 27     | 0.000000    | 0.000000 | 0.000017 | 0.000008 | 0.008365 | 0.000000 |
| C Max / 9      | 0.000000    | 0.000000 | 0.000012 | 0.000006 | 0.005906 | 0.000000 |
| C Max / 3      | 0.000000    | 0.000000 | 0.000018 | 0.000005 | 0.007215 | 0.000000 |
| C Max          | 0.000000    | 0.000000 | 0.000015 | 0.000113 | 0.010214 | 0.000000 |
|                | 5-FU        |          |          |          |          |          |
|                | CaCO2       | HCT 116  | HT29     | SW48     | SW480    | SW620    |
| C Max / 59 049 | 0.588898    | 0.955069 | 0.033774 | 0.206785 | 0.542621 | 0.959883 |
| C Max / 19 683 | 0.674734    | 0.993181 | 0.000009 | 0.066833 | 0.110778 | 0.000021 |
| C Max / 6561   | 0.143048    | 0.970795 | 0.000000 | 0.000010 | 0.000056 | 0.000012 |
| C Max / 2187   | 0.007930    | 0.530379 | 0.000000 | 0.000000 | 0.000000 | 0.000001 |

|                    |              |                |             |             |              |              |
|--------------------|--------------|----------------|-------------|-------------|--------------|--------------|
| C Max / 729        | 0.000724     | 0.188069       | 0.000000    | 0.000000    | 0.000000     | 0.000000     |
| C Max / 243        | 0.000027     | 0.454271       | 0.000000    | 0.000000    | 0.000000     | 0.000000     |
| C Max / 81         | 0.000001     | 0.165215       | 0.000000    | 0.000000    | 0.000000     | 0.000000     |
| C Max / 27         | 0.000000     | 0.014706       | 0.000000    | 0.000000    | 0.000000     | 0.000000     |
| C Max / 9          | 0.000000     | 0.000764       | 0.000000    | 0.000000    | 0.000000     | 0.000000     |
| C Max / 3          | 0.000000     | 0.000064       | 0.000000    | 0.000000    | 0.000000     | 0.000000     |
| C Max              | 0.000000     | 0.000000       | 0.000000    | 0.000000    | 0.000000     | 0.000000     |
| <b>raltitrexed</b> |              |                |             |             |              |              |
|                    | <b>CaCO2</b> | <b>HCT 116</b> | <b>HT29</b> | <b>SW48</b> | <b>SW480</b> | <b>SW620</b> |
| C Max / 59 049     | 0.104017     | 0.999016       | 0.829700    | 0.911253    | 0.856710     | 0.361116     |
| C Max / 19 683     | 0.107258     | 0.816367       | 0.878751    | 0.985889    | 0.893396     | 0.075492     |
| C Max / 6561       | 0.541102     | 0.888802       | 0.800379    | 0.110970    | 0.702164     | 0.002447     |
| C Max / 2187       | 0.369618     | 0.820971       | 0.346700    | 0.000476    | 0.184678     | 0.000165     |
| C Max / 729        | 0.972874     | 0.402383       | 0.205667    | 0.000130    | 0.080757     | 0.000055     |
| C Max / 243        | 0.250864     | 0.392428       | 0.161153    | 0.002552    | 0.153314     | 0.000001     |
| C Max / 81         | 0.855081     | 0.177644       | 0.165215    | 0.000342    | 0.066727     | 0.000001     |
| C Max / 27         | 0.701725     | 0.009413       | 0.092201    | 0.000141    | 0.040921     | 0.000000     |
| C Max / 9          | 0.318693     | 0.004038       | 0.220232    | 0.000135    | 0.030790     | 0.000000     |
| C Max / 3          | 0.005422     | 0.000626       | 0.236073    | 0.000083    | 0.012613     | 0.000000     |
| C Max              | 0.000000     | 0.000000       | 0.000698    | 0.000005    | 0.000762     | 0.000000     |
| <b>gemcitabine</b> |              |                |             |             |              |              |
|                    | <b>CaCO2</b> | <b>HCT 116</b> | <b>HT29</b> | <b>SW48</b> | <b>SW480</b> | <b>SW620</b> |
| C Max / 59 049     | 0.065324     | 0.012074       | 0.052981    | 0.000022    | 0.010950     | 0.00         |
| C Max / 19 683     | 0.312947     | 0.005948       | 0.068738    | 0.000010    | 0.043549     | 0.00         |
| C Max / 6561       | 0.511429     | 0.006540       | 0.049740    | 0.000005    | 0.015645     | 0.00         |
| C Max / 2187       | 0.333330     | 0.000842       | 0.046894    | 0.000001    | 0.001154     | 0.00         |
| C Max / 729        | 0.209661     | 0.000066       | 0.024041    | 0.000001    | 0.000807     | 0.00         |
| C Max / 243        | 0.086645     | 0.000037       | 0.020372    | 0.000000    | 0.000644     | 0.00         |
| C Max / 81         | 0.070336     | 0.000010       | 0.020149    | 0.000000    | 0.000445     | 0.00         |
| C Max / 27         | 0.042973     | 0.000006       | 0.021192    | 0.000000    | 0.000329     | 0.00         |
| C Max / 9          | 0.007329     | 0.000002       | 0.013916    | 0.000000    | 0.000141     | 0.00         |
| C Max / 3          | 0.000000     | 0.000000       | 0.000146    | 0.000000    | 0.000012     | 0.00         |
| C Max              | 0.000000     | 0.000000       | 0.000054    | 0.000000    | 0.000013     | 0.00         |
| <b>cisplatin</b>   |              |                |             |             |              |              |
|                    | <b>CaCO2</b> | <b>HCT 116</b> | <b>HT29</b> | <b>SW48</b> | <b>SW480</b> | <b>SW620</b> |
| C Max / 59 049     | 0.909528     | 0.915765       | 0.979775    | 0.817637    | 0.150723     | 0.867400     |
| C Max / 19 683     | 0.845843     | 0.823523       | 0.912750    | 0.419344    | 0.288074     | 0.808878     |
| C Max / 6561       | 0.997337     | 0.981214       | 0.538824    | 0.294622    | 0.613341     | 0.139744     |
| C Max / 2187       | 0.769288     | 0.753844       | 0.629160    | 0.112114    | 0.103623     | 0.163361     |
| C Max / 729        | 0.772946     | 0.781347       | 0.023687    | 0.461584    | 0.000645     | 0.095342     |
| C Max / 243        | 0.483939     | 0.482962       | 0.002191    | 0.004189    | 0.000012     | 0.000029     |
| C Max / 81         | 0.339277     | 0.387137       | 0.000000    | 0.000191    | 0.000000     | 0.000000     |
| C Max / 27         | 0.005131     | 0.000016       | 0.000000    | 0.000015    | 0.000000     | 0.000000     |
| C Max / 9          | 0.000049     | 0.000000       | 0.000000    | 0.000002    | 0.000000     | 0.000000     |
| C Max / 3          | 0.000003     | 0.000000       | 0.000000    | 0.000001    | 0.000000     | 0.000000     |
| C Max              | 0.000000     | 0.000000       | 0.000000    | 0.000001    | 0.000000     | 0.000000     |
| <b>oxaliplatin</b> |              |                |             |             |              |              |
|                    | <b>CaCO2</b> | <b>HCT 116</b> | <b>HT29</b> | <b>SW48</b> | <b>SW480</b> | <b>SW620</b> |
| C Max / 59 049     | 0.762307     | 0.840433       | 0.674313    | 0.628147    | 0.665114     | 0.938514     |
| C Max / 19 683     | 0.814301     | 0.959414       | 0.603271    | 0.433616    | 0.996916     | 0.543320     |
| C Max / 6561       | 0.572786     | 0.928276       | 0.905187    | 0.315179    | 0.712286     | 0.267300     |
| C Max / 2187       | 0.255470     | 0.650532       | 0.013333    | 0.100569    | 0.558075     | 0.000033     |

|                     |              |                |             |             |              |              |
|---------------------|--------------|----------------|-------------|-------------|--------------|--------------|
| C Max / 729         | 0.067708     | 0.848791       | 0.002818    | 0.022747    | 0.001084     | 0.000000     |
| C Max / 243         | 0.001305     | 0.437154       | 0.000068    | 0.016278    | 0.004190     | 0.000000     |
| C Max / 81          | 0.000106     | 0.421409       | 0.000016    | 0.008482    | 0.000120     | 0.000000     |
| C Max / 27          | 0.000010     | 0.049870       | 0.000000    | 0.001596    | 0.000001     | 0.000000     |
| C Max / 9           | 0.000012     | 0.000129       | 0.000000    | 0.000773    | 0.000000     | 0.000000     |
| C Max / 3           | 0.000003     | 0.000000       | 0.000000    | 0.000598    | 0.000000     | 0.000000     |
| C Max               | 0.000001     | 0.000000       | 0.000000    | 0.000293    | 0.000000     | 0.000000     |
| <b>mitomycin c</b>  |              |                |             |             |              |              |
|                     | <b>CaCO2</b> | <b>HCT 116</b> | <b>HT29</b> | <b>SW48</b> | <b>SW480</b> | <b>SW620</b> |
| C Max / 59 049      | 0.691972     | 0.914507       | 0.710627    | 0.892610    | 0.501034     | 0.271583     |
| C Max / 19 683      | 0.940662     | 0.859913       | 0.715526    | 0.774722    | 0.307664     | 0.118708     |
| C Max / 6561        | 0.807983     | 0.803137       | 0.845628    | 0.047691    | 0.192476     | 0.002914     |
| C Max / 2187        | 0.999702     | 0.568554       | 0.421334    | 0.000894    | 0.063375     | 0.000203     |
| C Max / 729         | 0.758469     | 0.131871       | 0.075168    | 0.000060    | 0.001519     | 0.000000     |
| C Max / 243         | 0.700307     | 0.000487       | 0.001491    | 0.000001    | 0.000027     | 0.000000     |
| C Max / 81          | 0.172426     | 0.000000       | 0.000080    | 0.000000    | 0.000001     | 0.000000     |
| C Max / 27          | 0.000675     | 0.000000       | 0.000007    | 0.000000    | 0.000000     | 0.000000     |
| C Max / 9           | 0.000001     | 0.000000       | 0.000003    | 0.000000    | 0.000000     | 0.000000     |
| C Max / 3           | 0.000000     | 0.000000       | 0.000003    | 0.000000    | 0.000000     | 0.000000     |
| C Max               | 0.000000     | 0.000000       | 0.000001    | 0.000000    | 0.000000     | 0.000000     |
| <b>irinotecan</b>   |              |                |             |             |              |              |
|                     | <b>CaCO2</b> | <b>HCT 116</b> | <b>HT29</b> | <b>SW48</b> | <b>SW480</b> | <b>SW620</b> |
| C Max / 59 049      | 0.531639     | 0.798530       | 0.389022    | 0.498134    | 0.853986     | 0.970194     |
| C Max / 19 683      | 0.817954     | 0.733610       | 0.923159    | 0.452620    | 0.226172     | 0.072380     |
| C Max / 6561        | 0.873064     | 0.947787       | 0.221012    | 0.072979    | 0.460960     | 0.637463     |
| C Max / 2187        | 0.659807     | 0.549807       | 0.229030    | 0.004467    | 0.043006     | 0.383565     |
| C Max / 729         | 0.882144     | 0.155519       | 0.023224    | 0.000683    | 0.006200     | 0.127432     |
| C Max / 243         | 0.429677     | 0.001119       | 0.001581    | 0.000064    | 0.000167     | 0.003251     |
| C Max / 81          | 0.138901     | 0.000000       | 0.000323    | 0.000022    | 0.000035     | 0.001487     |
| C Max / 27          | 0.003098     | 0.000000       | 0.000000    | 0.000002    | 0.000004     | 0.000020     |
| C Max / 9           | 0.000001     | 0.000000       | 0.000000    | 0.000001    | 0.000000     | 0.000001     |
| C Max / 3           | 0.000001     | 0.000000       | 0.000000    | 0.000000    | 0.000000     | 0.000001     |
| C Max               | 0.000001     | 0.000000       | 0.000000    | 0.000000    | 0.000000     | 0.000000     |
| <b>streptozocin</b> |              |                |             |             |              |              |
|                     | <b>CaCO2</b> | <b>HCT 116</b> | <b>HT29</b> | <b>SW48</b> | <b>SW480</b> | <b>SW620</b> |
| C Max / 59 049      | 0.901238     | 0.971391       | 0.421162    | 0.884789    | 0.698013     | 0.843329     |
| C Max / 19 683      | 0.965997     | 0.915907       | 0.629827    | 0.450871    | 0.840989     | 0.538511     |
| C Max / 6561        | 0.365445     | 0.699865       | 0.923509    | 0.787214    | 0.945067     | 0.427658     |
| C Max / 2187        | 0.819338     | 0.878870       | 0.656708    | 0.710166    | 0.684365     | 0.004309     |
| C Max / 729         | 0.368347     | 0.797660       | 0.890968    | 0.350626    | 0.201647     | 0.000052     |
| C Max / 243         | 0.274797     | 0.214547       | 0.255011    | 0.101211    | 0.318057     | 0.000000     |
| C Max / 81          | 0.115040     | 0.054057       | 0.144423    | 0.001843    | 0.056790     | 0.000001     |
| C Max / 27          | 0.046604     | 0.003801       | 0.000978    | 0.000290    | 0.008125     | 0.000000     |
| C Max / 9           | 0.002518     | 0.000253       | 0.000034    | 0.000013    | 0.005607     | 0.000000     |
| C Max / 3           | 0.000000     | 0.000000       | 0.000000    | 0.000000    | 0.000000     | 0.000000     |
| C Max               | 0.000000     | 0.000000       | 0.000000    | 0.000000    | 0.000000     | 0.000000     |
| <b>paclitaxel</b>   |              |                |             |             |              |              |
|                     | <b>CaCO2</b> | <b>HCT 116</b> | <b>HT29</b> | <b>SW48</b> | <b>SW480</b> | <b>SW620</b> |
| C Max / 59 049      | 0.565191     | 0.009566       | 0.408540    | 0.859325    | 0.722051     | 0.534921     |
| C Max / 19 683      | 0.364147     | 0.014782       | 0.907698    | 0.137379    | 0.928796     | 0.279793     |
| C Max / 6561        | 0.083295     | 0.003726       | 0.911025    | 0.113074    | 0.915083     | 0.619407     |
| C Max / 2187        | 0.020097     | 0.016540       | 0.251538    | 0.148185    | 0.844731     | 0.647216     |

|             |          |          |          |          |          |          |
|-------------|----------|----------|----------|----------|----------|----------|
| C Max / 729 | 0.097149 | 0.042329 | 0.145584 | 0.939745 | 0.360457 | 0.942764 |
| C Max / 243 | 0.034851 | 0.003338 | 0.357841 | 0.786418 | 0.019519 | 0.512017 |
| C Max / 81  | 0.008287 | 0.000274 | 0.198257 | 0.411041 | 0.520269 | 0.097827 |
| C Max / 27  | 0.000000 | 0.000001 | 0.036192 | 0.015631 | 0.294273 | 0.000823 |
| C Max / 9   | 0.000000 | 0.000000 | 0.000486 | 0.012531 | 0.155020 | 0.001005 |
| C Max / 3   | 0.000000 | 0.000000 | 0.000176 | 0.103943 | 0.130981 | 0.000127 |
| C Max       | 0.000000 | 0.000000 | 0.000071 | 0.111858 | 0.082116 | 0.000067 |
